# Supplementary material
Source: PubMed Central journal article supplement (PMC2647703)
Supplement: er.2008-0005_1.pdf [file er.2008-0005_1.pdf]

**XV. Appendix**

LHsimulated (mean SD time d.f.)  
@\$ from NATV\_FIX translator  
0.531239986 3.45305987E-02 10.0000000 1.00000000  
1.12627006 7.32075498E-02 20.0000000 1.00000000  
0.700049996 4.55032475E-02 30.0000000 1.00000000  
0.686969995 4.46530469E-02 40.0000000 1.00000000  
1.09103000 7.09169507E-02 50.0000000 1.00000000  
1.55990005 0.101393498 60.0000000 1.00000000  
1.27637994 8.29646960E-02 70.0000000 1.00000000  
3.38364005 0.219936594 80.0000000 1.00000000  
3.66398001 0.238158688 90.0000000 1.00000000  
2.71124005 0.176230595 100.000000 1.00000000  
2.55702996 0.166206941 110.000000 1.00000000  
2.42347002 0.157525554 120.000000 1.00000000  
2.26152992 0.146999449 130.000000 1.00000000  
1.95936000 0.127358392 140.000000 1.00000000  
1.64506996 0.106929548 150.000000 1.00000000  
1.97981000 0.128687650 160.000000 1.00000000  
1.67115998 0.108625397 170.000000 1.00000000  
1.74398994 0.113359347 180.000000 1.00000000  
1.51795006 9.86667499E-02 190.000000 1.00000000  
1.51629996 9.85594988E-02 200.000000 1.00000000  
1.39390004 9.06035006E-02 210.000000 1.00000000  
2.01359010 0.130883351 220.000000 1.00000000  
5.70963001 0.371125937 230.000000 1.00000000  
5.34511995 0.347432792 240.000000 1.00000000  
4.12387991 0.268052191 250.000000 1.00000000  
4.07243013 0.264707953 260.000000 1.00000000  
3.43021011 0.222963646 270.000000 1.00000000  
3.24443007 0.210887954 280.000000 1.00000000  
2.94893003 0.191680446 290.000000 1.00000000  
5.66209984 0.368036479 300.000000 1.00000000  
3.98295999 0.258892387 310.000000 1.00000000  
4.11500978 0.267475635 320.000000 1.00000000  
2.86192012 0.186024800 330.000000 1.00000000  
3.56286001 0.231585890 340.000000 1.00000000  
2.95447993 0.192041188 350.000000 1.00000000  
2.49166012 0.161957905 360.000000 1.00000000  
4.63350010 0.301177502 370.000000 1.00000000  
4.48861980 0.291760296 380.000000 1.00000000  
4.03441000 0.262236655 390.000000 1.00000000  
3.36438990 0.218685344 400.000000 1.00000000  
2.96849990 0.192952484 410.000000 1.00000000  
3.46477008 0.225210056 420.000000 1.00000000  
2.97907996 0.193640187 430.000000 1.00000000  
2.91090989 0.189209133 440.000000 1.00000000  
2.49975991 0.162484393 450.000000 1.00000000

4.85492992 0.315570444 460.000000 1.00000000  
4.20957994 0.273622692 470.000000 1.00000000  
4.22168016 0.274409205 480.000000 1.00000000  
3.60173011 0.234112456 490.000000 1.00000000  
4.09961987 0.266475290 500.000000 1.00000000  
3.03429008 0.197228849 510.000000 1.00000000  
3.24155998 0.210701391 520.000000 1.00000000  
2.57627010 0.167457551 530.000000 1.00000000  
2.74097991 0.178163692 540.000000 1.00000000  
2.76946998 0.180015549 550.000000 1.00000000  
1.89336002 0.123068400 560.000000 1.00000000  
2.39515996 0.155685395 570.000000 1.00000000  
2.01621008 0.131053656 580.000000 1.00000000  
2.21515989 0.143985391 590.000000 1.00000000  
6.77187014 0.440171540 600.000000 1.00000000  
5.31332016 0.345365793 610.000000 1.00000000  
4.74033022 0.308121443 620.000000 1.00000000  
4.32597017 0.281188041 630.000000 1.00000000  
3.45469999 0.224555492 640.000000 1.00000000  
3.24087000 0.210656539 650.000000 1.00000000  
3.03119993 0.197027996 660.000000 1.00000000  
2.87398005 0.186808705 670.000000 1.00000000  
4.89985991 0.318490893 680.000000 1.00000000  
5.13968992 0.334079832 690.000000 1.00000000  
4.46957016 0.290522069 700.000000 1.00000000  
4.18563986 0.272066593 710.000000 1.00000000  
3.75875998 0.244319394 720.000000 1.00000000  
2.95943999 0.192363590 730.000000 1.00000000  
3.16219997 0.205542997 740.000000 1.00000000  
3.34209991 0.217236489 750.000000 1.00000000  
4.72487020 0.307116568 760.000000 1.00000000  
4.15127993 0.269833177 770.000000 1.00000000  
3.56491995 0.231719792 780.000000 1.00000000  
3.17336011 0.206268400 790.000000 1.00000000  
2.62905002 0.170888245 800.000000 1.00000000  
3.51378012 0.228395700 810.000000 1.00000000  
3.29286003 0.214035898 820.000000 1.00000000  
2.76852989 0.179954439 830.000000 1.00000000  
3.15105009 0.204818249 840.000000 1.00000000  
5.06537008 0.329249054 850.000000 1.00000000  
4.02441978 0.261587292 860.000000 1.00000000  
4.12976980 0.268435031 870.000000 1.00000000  
3.62755990 0.235791385 880.000000 1.00000000  
3.45493007 0.224570453 890.000000 1.00000000  
2.89696002 0.188302398 900.000000 1.00000000  
3.01094007 0.195711106 910.000000 1.00000000  
4.97057009 0.323087037 920.000000 1.00000000  
4.52489996 0.294118494 930.000000 1.00000000  
3.89756989 0.253342032 940.000000 1.00000000

3.83454990 0.249245733 950.000000 1.00000000  
2.97707009 0.193509549 960.000000 1.00000000  
2.86964989 0.186527237 970.000000 1.00000000  
3.37861991 0.219610289 980.000000 1.00000000  
2.59613991 0.168749094 990.000000 1.00000000  
2.79550004 0.181707501 1000.000000 1.00000000  
2.67756009 0.174041405 1010.000000 1.00000000  
1.74616003 0.113500401 1020.000000 1.00000000  
5.45041990 0.354277283 1030.000000 1.00000000  
5.81934023 0.378257096 1040.000000 1.00000000  
4.81033993 0.312672079 1050.000000 1.00000000  
4.22698021 0.274753720 1060.000000 1.00000000  
4.81407022 0.312914550 1070.000000 1.00000000  
4.64327002 0.301812530 1080.000000 1.00000000  
4.18923998 0.272300601 1090.000000 1.00000000  
3.94253993 0.256265104 1100.000000 1.00000000  
3.24527001 0.210942551 1110.000000 1.00000000  
3.19967008 0.207978547 1120.000000 1.00000000  
3.01711988 0.196112782 1130.000000 1.00000000  
2.86075997 0.185949400 1140.000000 1.00000000  
2.68223000 0.174344942 1150.000000 1.00000000  
5.32212019 0.345937818 1160.000000 1.00000000  
5.32027006 0.345817536 1170.000000 1.00000000  
4.30443001 0.279787958 1180.000000 1.00000000  
3.85830998 0.250790149 1190.000000 1.00000000  
3.77859998 0.245609000 1200.000000 1.00000000  
3.44068003 0.223644197 1210.000000 1.00000000  
2.82527995 0.183643192 1220.000000 1.00000000  
2.84299994 0.184794992 1230.000000 1.00000000  
2.34448004 0.152391195 1240.000000 1.00000000  
2.59262991 0.168520942 1250.000000 1.00000000  
2.26640010 0.147316009 1260.000000 1.00000000  
2.88299990 0.187394992 1270.000000 1.00000000  
2.85170007 0.185360506 1280.000000 1.00000000  
6.68208981 0.434335828 1290.000000 1.00000000  
5.61144018 0.364743590 1300.000000 1.00000000  
5.02435017 0.326582760 1310.000000 1.00000000  
3.84386992 0.249851540 1320.000000 1.00000000  
3.74787998 0.243612200 1330.000000 1.00000000  
2.87184000 0.186669603 1340.000000 1.00000000  
3.58925009 0.233301252 1350.000000 1.00000000  
2.66932011 0.173505798 1360.000000 1.00000000  
2.59156990 0.168452039 1370.000000 1.00000000  
2.75209999 0.178886488 1380.000000 1.00000000  
2.62006998 0.170304552 1390.000000 1.00000000  
3.10011005 0.201507151 1400.000000 1.00000000  
2.63022995 0.170964941 1410.000000 1.00000000  
2.50951004 0.163118154 1420.000000 1.00000000  
6.10625982 0.396906883 1430.000000 1.00000000

5.22432995 0.339581430 1440.00000 1.00000000  
4.67721987 0.304019272 1450.00000 1.00000000

LHinfused (mean SD time d.f.)

@\$ from NATV\_FIX translator

6.69999981 0.435499966 10.0000000 1.00000000  
7.40000010 0.481000006 20.0000000 1.00000000  
5.69999981 0.370499969 30.0000000 1.00000000  
5.69999981 0.370499969 40.0000000 1.00000000  
5.09999990 0.331499994 50.0000000 1.00000000  
4.80000019 0.312000006 60.0000000 1.00000000  
5.00000000 0.324999988 70.0000000 1.00000000  
10.6999998 0.695499957 80.0000000 1.00000000  
10.3000002 0.669499993 90.0000000 1.00000000  
8.69999981 0.565499961 100.000000 1.00000000  
8.19999981 0.532999992 110.000000 1.00000000  
7.19999981 0.467999965 120.000000 1.00000000  
6.50000000 0.422499985 130.000000 1.00000000  
6.90000010 0.448500007 140.000000 1.00000000  
6.19999981 0.402999967 150.000000 1.00000000  
5.19999981 0.337999970 160.000000 1.00000000  
5.30000019 0.344500005 170.000000 1.00000000  
5.19999981 0.337999970 180.000000 1.00000000  
4.80000019 0.312000006 190.000000 1.00000000  
9.00000000 0.584999979 200.000000 1.00000000  
9.50000000 0.617500007 210.000000 1.00000000  
8.80000019 0.572000027 220.000000 1.00000000  
7.69999981 0.500499964 230.000000 1.00000000  
7.50000000 0.487499982 240.000000 1.00000000  
6.69999981 0.435499966 250.000000 1.00000000  
6.00000000 0.389999986 260.000000 1.00000000  
6.19999981 0.402999967 270.000000 1.00000000  
6.19999981 0.402999967 280.000000 1.00000000  
5.80000019 0.377000004 290.000000 1.00000000  
4.80000019 0.312000006 300.000000 1.00000000  
4.90000010 0.318500012 310.000000 1.00000000  
9.30000019 0.604499996 320.000000 1.00000000  
9.19999981 0.597999990 330.000000 1.00000000  
8.69999981 0.565499961 340.000000 1.00000000  
8.39999962 0.545999944 350.000000 1.00000000  
8.19999981 0.532999992 360.000000 1.00000000  
7.80000019 0.507000029 370.000000 1.00000000  
6.59999990 0.428999990 380.000000 1.00000000  
6.19999981 0.402999967 390.000000 1.00000000  
5.90000010 0.383500010 400.000000 1.00000000  
6.59999990 0.428999990 410.000000 1.00000000  
5.59999990 0.363999993 420.000000 1.00000000  
4.80000019 0.312000006 430.000000 1.00000000  
8.89999962 0.578499973 440.000000 1.00000000

10.8000002 0.702000022 450.000000 1.00000000  
9.89999962 0.643499970 460.000000 1.00000000  
8.10000038 0.526499987 470.000000 1.00000000  
8.19999981 0.532999992 480.000000 1.00000000  
7.69999981 0.500499964 490.000000 1.00000000  
6.40000010 0.416000009 500.000000 1.00000000  
6.40000010 0.416000009 510.000000 1.00000000  
5.90000010 0.383500010 520.000000 1.00000000  
5.50000000 0.357499987 530.000000 1.00000000  
5.00000000 0.324999988 540.000000 1.00000000  
4.80000019 0.312000006 550.000000 1.00000000  
8.60000038 0.559000015 560.000000 1.00000000  
9.80000019 0.637000024 570.000000 1.00000000  
8.30000019 0.539499998 580.000000 1.00000000  
8.00000000 0.519999981 590.000000 1.00000000  
7.80000019 0.507000029 600.000000 1.00000000  
7.19999981 0.467999965 610.000000 1.00000000

LHsheep (mean SD time d.f.)

@\$ from NATV\_FIX translator

24.9599991 1.62239993 10.0000000 1.00000000  
17.9799995 1.16869998 20.0000000 1.00000000  
14.4799995 0.941199958 30.0000000 1.00000000  
18.2000008 1.18299997 40.0000000 1.00000000  
44.0999985 2.86649990 50.0000000 1.00000000  
32.1599998 2.09039998 60.0000000 1.00000000  
14.5200005 0.943800032 70.0000000 1.00000000  
18.1299992 1.17844987 80.0000000 1.00000000  
14.8599997 0.965899944 90.0000000 1.00000000  
12.3500004 0.802749991 100.000000 1.00000000  
15.3800001 0.999700010 110.000000 1.00000000  
43.6699982 2.83854985 120.000000 1.00000000  
36.9000015 2.39849997 130.000000 1.00000000  
23.2800007 1.51320004 140.000000 1.00000000  
20.4099998 1.32664990 150.000000 1.00000000  
52.2599983 3.39689970 160.000000 1.00000000  
39.6899986 2.57984996 170.000000 1.00000000  
31.2000008 2.02800012 180.000000 1.00000000  
30.3099995 1.97014987 190.000000 1.00000000  
52.5200005 3.41380000 200.000000 1.00000000  
35.6399994 2.31659985 210.000000 1.00000000  
25.5000000 1.65749991 220.000000 1.00000000  
34.2900009 2.22885013 230.000000 1.00000000  
39.7000008 2.58049989 240.000000 1.00000000  
30.4599991 1.97989988 250.000000 1.00000000  
21.9500008 1.42675006 260.000000 1.00000000  
20.2399998 1.31559992 270.000000 1.00000000  
36.7500000 2.38874984 280.000000 1.00000000  
32.1800003 2.09170008 290.000000 1.00000000

25.8700008 1.68155003 300.000000 1.00000000  
18.7700005 1.22004998 310.000000 1.00000000  
40.1699982 2.61104989 320.000000 1.00000000  
38.4500008 2.49924994 330.000000 1.00000000  
29.6299992 1.92594993 340.000000 1.00000000  
27.2600002 1.77189994 350.000000 1.00000000
